# Supplementary material for: Based on the “Scenario-Response” Framework: Analysis of Community Scenario Elements in Sudden Major Respiratory Infectious Disease Outbreaks
Source: Research Square preprint supplement (doi:10.21203/rs.3.rs-8190005/v1), 2025-12-08
Supplement: Supplementary file 1 [file 5d96438c013ea82306e6a3f4.docx]

| **Table 3 Results of Selective Coding** | |
| --- | --- |
| **Core Categories** | **Main Categories** |
| disaster-causing scenarios | Disaster-causing substance；Human Factors；Cultural Factors；Environmental Factors；Disaster-causing process |
| disaster-bearing scenarios | Personal Safety；Social Impacts；Economic Impacts； |
| disaster-resisting scenarios | Community Governance；Resource Allocation；Risk Communication；Training and Drills；Technological Factors；Supervise |
