# Supplementary material for: Based on the “Scenario-Response” Framework: Analysis of Community Scenario Elements in Sudden Major Respiratory Infectious Disease Outbreaks
Source: Research Square preprint supplement (doi:10.21203/rs.3.rs-8190005/v1), 2025-12-08
Supplement: Supplementary file 2 [file a0fe9991f6018da637b1f111.docx]

| **Table 2 Results of Axial Coding** | |
| --- | --- |
| **Main Categories** | **Subcategories** |
| Cultural Factors | Living habits；Cultural Factors |
| Environmental Factors | Community Environmental Factors |
| Disaster-causing substance | Virological Characteristics；Epidemiological Characteristics；Clinical Features |
| Disaster-causing process | Disease Progression |
| Human Factors | Population Characteristics；Population Mobility |
| Personal Safety | Population Immunity；Personnel Diagnosis and Treatment |
| Social Impacts | Community Disruptions；Psychological Crisis；Vulnerable Populations |
| Economic Impacts | Economic Losses |
| Technological Factors | Technology Applications；Epidemic Surveillance；Testing |
| Community Governance | Community emergency management；Community case management；Emergency Management Systems；Psychological Counseling；Public Opinion Monitoring； |
| Resource Allocation | Resource Security；Financial Security；Staff Support and Incentives；Daily Necessities Supply；Personal Protective Equipment; Medical Resources；Community Workers；Epidemic prevention and control leading group；Resource Allocation Equity； |
| Risk Communication | Risk Assessment；Multi-Sectoral Coordination Mechanism；Epidemic Information Disclosure；Health Education；Information Reporting |
| Training and Drills | Personnel Training；Emergency Drills |
| Supervise | Accountability Mechanisms； |
