# Supplementary material for: Based on the “Scenario-Response” Framework: Analysis of Community Scenario Elements in Sudden Major Respiratory Infectious Disease Outbreaks
Source: Research Square preprint supplement (doi:10.21203/rs.3.rs-8190005/v1), 2025-12-08
Supplement: Supplementary file 3 [file e0bb1cf10c870b2a55619c4f.docx]

| **Table 1 Results of Open coding** | |
| --- | --- |
| **Initial concept** | **Categorization** |
| a1 Population; a2 Population Density; a3 Age Difference; a4 Economic Income Level; a5 Education Level; a6 Geographical Location; a7 Gender Differences; a8 Population Structure; a9 Aging | A1 Population characteristics |
| a10 Returning home during the Spring Festival; a11 Visit relatives and friends during the Spring Festival; | A2 Population mobility |
| a12 Wash hands before meals；a13 Open windows for ventilation；a14 Maintain regular daily routines；a15 Disinfect surfaces；a16 Practice hygienic dining habits；a17 Practice safe poultry farming；a18 Forms of living environment；a19 Wear face masks properly； | A3 Living habits |
| a20 Closure of public venues；a21 Ban on mass gatherings；a22 Movement restrictions；a23 Maintain physical distancing；a24 Community containment measures；a25 Cancellation of congregate events；a26 Road closures；a27Grid-based management；a28 Culling of infected poultry；a29 Live market closures；a30 Full-chain wildlife trade restrictions； | A4 Community emergency management |
| a31 Isolation；a32 Close contact management；a33 Suspected case management；a34 Epidemiological investigation；a35 Medical observation；a36 Emergency response level；a37 “Four Earlies” ( Early Detection, Early Reporting, Early Isolation, Early Treatment); “Four Concentrations” (Concentrate Patients, Concentrate Experts, Concentrate Resources, Concentrate Treatment)；a38 Infection Prevention and Protection；a39 Fever Clinic；a40 Pre-examination Triage；a41 Disinfection and Isolation；a42 Patient Referral； | A5 Community case management |
| a43 Community Party Branch；a44 Community Residents’ Committee | A6 Epidemic prevention and control leading group |
| a45 Community Police Officer；a46 Community Property Service Staff；a47 Community Grid Worker；a48 Community Resident Representative；a49 Community Volunteers；a50 Community Assistant；a51 Community Health Worker；a52Epidemiological Investigator； | A7 Community Workers |
| a53 Prevention for Pregnant and Postpartum Women；a54 Infants and Young Children；a55 Elderly Population； | A8 Vulnerable Populations |
| a56 Resumption of Work and Production；a57 Material preparation；a58 Green Channel（Fast-track mechanism for priority handling, e.g., medical supplies）；a59 E-commerce Supply-Demand Coordination Mechanism；a60 Daily Necessities Supply Team；a61 Assessment of Daily Necessities Supply Status；a62 Material Allocation；a63 Governor’s “Rice Bag” and Mayor’s “Vegetable Basket” Responsibility System；a64 Logistics Transfer Station； | A9 Resource Security |
| a65 Medical Insurance Reimbursement；a66 Urban-Rural Medical Assistance Program；a67 Financial Support；a68 Epidemic Prevention-Control and Treatment Funding； | A10 Financial Security |
| a69 Paying attention to the psychological status of staff；a70 Staff Compensation and Benefits；a71 Community Workforce Management；a72 Personnel Allocation；a73 Temporary Work Subsidies；a74 Health Protection for Community Staff；a75 Humanistic Care Support； | A11 Staff Support and Incentives |
| a76 Essential Living Supplies；a77 Supply-Demand Imbalance； | A12 Daily Necessities Supply |
| a78 Medical Masks；a79 Personal Protective Equipment；a80 Alcohol-Based Hand Sanitizer； | A13 Personal Protective Equipment |
| a81 Protective Coveralls；a82 Protective Goggles；a83 Protective Goggles；a84 Medical Supplies；a85 Ambulances；a86 Basic Medical Equipment；a87 Community Hospital Bed Capacity；a88 Medications；a89 Medical Consumables；a90 Vehicle-Mounted Equipment for Professional Teams；a91 Thermometers；a92 Vaccines | A14 Medical Resources |
| a93 Inter-Departmental Communication on Epidemic Control；a94 Community-Level Coordination； | A15 Multi-Sectoral Coordination Mechanism |
| a95 Dissemination of Epidemic Prevention Knowledge；a96 Q&A Releases on Epidemic Control；a97 Public Awareness Campaigns & Advisory Services；a98 Educational Publications & Booklets；a99 Interpersonal Health Education Initiatives；a100 Personal Protection Guidance；a101 Health Advisories & Medical Care Guidelines； | A16 Health Education |
| a102 WeChat Coordination Groups；a103 Public opinion analysis and judgment； | A17 Public Opinion Monitoring |
| a104 Cumulative Confirmed Cases；a105 Cumulative Deaths；a106 Case Fatality Rate；a107 Newly Diagnosed；a108 New Deaths；a109 Transmission Intensity；a110 Transmission Routes；a111 Source of Infection；a112 Population Susceptibility；a113 High-Risk Groups； | A18 Epidemiological Characteristics |
| a114 Coronavirus Variants；a115 Novel Recombination Virus；a116 Infectiousness；a117 Basic Reproduction Number (R0)；a118 Latency Period；a119 Serial Interval；a120 Viral Mutation； | A19 Virological Characteristics |
| a121 Incubation Period；a122 Common Symptoms；a123 Prognosis；a124 Infection Spectrum；a125 Disease Progression；a126 Clinical Outcomes； | A20 Clinical Features |
| a127 RT-PCR Test Kits；a128 Testing Sites；a129 Specimen Collection and Referral；a130 Testing Indications； | A21 Testing |
| a131 Clinical Management；a132 Centralized Treatment；a133 Critical Case Management；a134 Medical Treatment Costs； | A22 Personnel Diagnosis and Treatment |
| a135 Viral Antibodies | A23 Population Immunity |
| a136 Psychological Panic；a137 Self-Medication Abuse；a138 Fraudulent Practices；a139 Acute Stress Reaction；a140 Post-Traumatic Stress Disorder (PTSD)；a141 Disordered Healthcare-Seeking；a142 Over-the-Counter Drug Stockpiling；a143 Panic Buying of Supplies；a144 Public Confidence in Pandemic Response； | A24 Psychological Crisis |
| a145 Mental Health Hotlines；a146 Establishment of Psychological Crisis Intervention Teams； | A25 Psychological Counseling |
| a147 Rumor Proliferation；a148 Public Dissatisfaction；a149 Information Fabrication；a150 Online Harassment；a151 Price Gouging；a152 Sale of Counterfeit/Substandard Goods；a153 Discrimination Against Patients；a154 Income Security Concerns； | A26 Community Disruptions |
| a155 Division of Responsibilities；a156 Contingency Plans；a157 Early Warning Concepts and Models；a158 Joint Prevention and Control Mechanism；a159 Evacuation Protocols | A27 Emergency Management Systems |
| a160Patriotic Health Campaign Implementation；a161 Environmental Sanitation Governance；a162 Promotion of Healthy Lifestyles；a163 Public Space Disinfection；a164 Domestic Waste Management | A28 Community Environmental Factors |
| a165 Public Compliance；a166 Cultural Differences；a167 Perceptual Variations； | A29 Cultural Factors |
| a168 Big Data Analytics；a169 Telemedicine Services；a170 “Internet Plus” Initiative | A30 Technology Applications |
| a171 Penalties for Quarantine Violations；a172 Supervision and Inspection； | A31 Accountability Mechanisms |
| a173 Epidemic Bulletins；a174 Clinical Treatment Protocols；a175 Disease Control Strategies；a176 Technical Guidelines；a177 Proactive Case Reporting；a178 Daily Situation Reports；a179 Information Disclosure Transparency； | A32 Epidemic Information Disclosure |
| a180 Case Reporting；a181 Reporting Timelines；a182 Reporting Categories；a183 “Zero-Reporting” Mechanism； | A33 Information Reporting |
| a184 Case Surveillance；a185 Epidemic Surveillance；a186 Outbreak Source Tracing；a187 High-Risk Site Monitoring；a188 Enhanced Animal Disease Surveillance；a189 Sentinel Surveillance Sites； a190 Temperature Screening；a191 Returnee Registration；a192 Vehicle Registration Tracking；a193 Real-Time Health Monitoring of High-Risk Groups； | A34 Epidemic Surveillance |
| a194 Income Reductio；a195 Supply Chain Disruption；a196 Labor Supply Shortfall； | A35 Economic Losses |
| A197 Virus Transmission Risk；a198 Epidemic Situation Analysis；a199 Dynamic Evaluation of Control Measures | A36 Risk Assessment |
| a200 Community Health Worker Training；a201 Technical Support Deployment；a202 Operational Guidance；a203 Community Leadership Training； | A37 Personnel Training |
| a204 Full-Scale Disease Response Exercise；a205 Containment Emergency Drill； | A38 Emergency Drills |
| a206 Resource Allocation Urgency；a207 Community-Level Epidemic Severity | A39 Resource Allocation Equity |
| a208 Incubation Stage；a209 Prodromal Stage；a210 Clinical Manifestation Stage；a211 Convalescence Stage | A40 Disease Progression |
